# Supplementary material
Source: ML conference proceedings conference paper supplement (https://aclanthology.org/2023.ijcnlp-main.57)

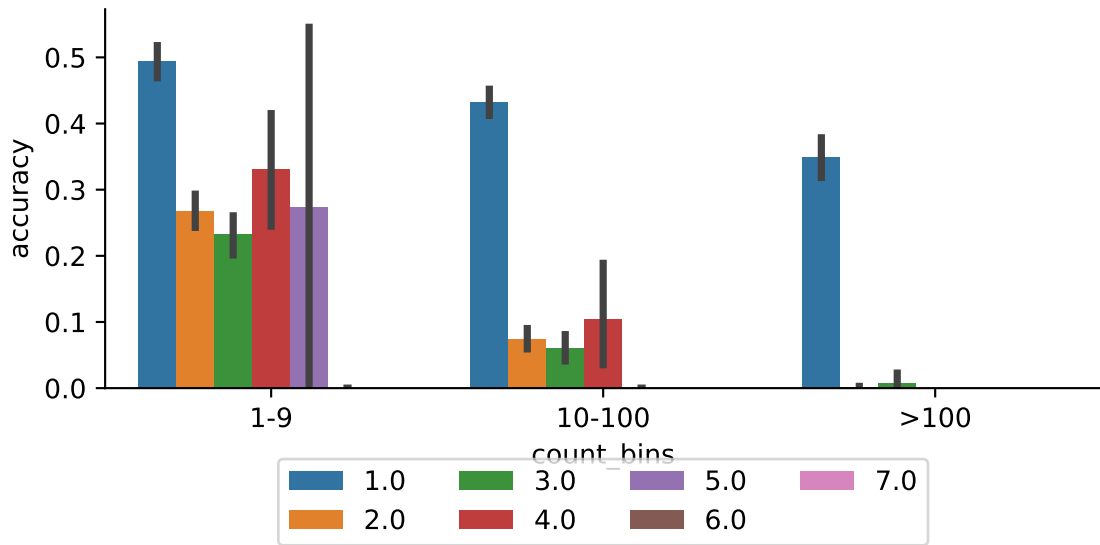

Supplement: Software [file graph_1_all_frequencies_German.pdf › MT-Tokenizer-Bias-main/graphs/graph_1_all_frequencies_German.pdf]

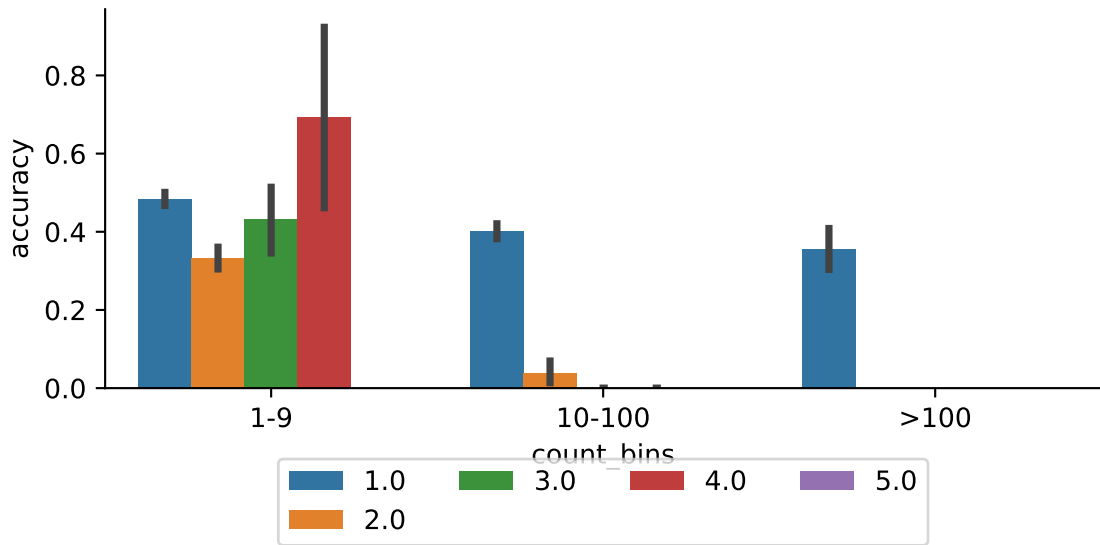

Supplement: Software [file graph_1_all_frequencies_Hebrew.pdf › MT-Tokenizer-Bias-main/graphs/graph_1_all_frequencies_Hebrew.pdf]

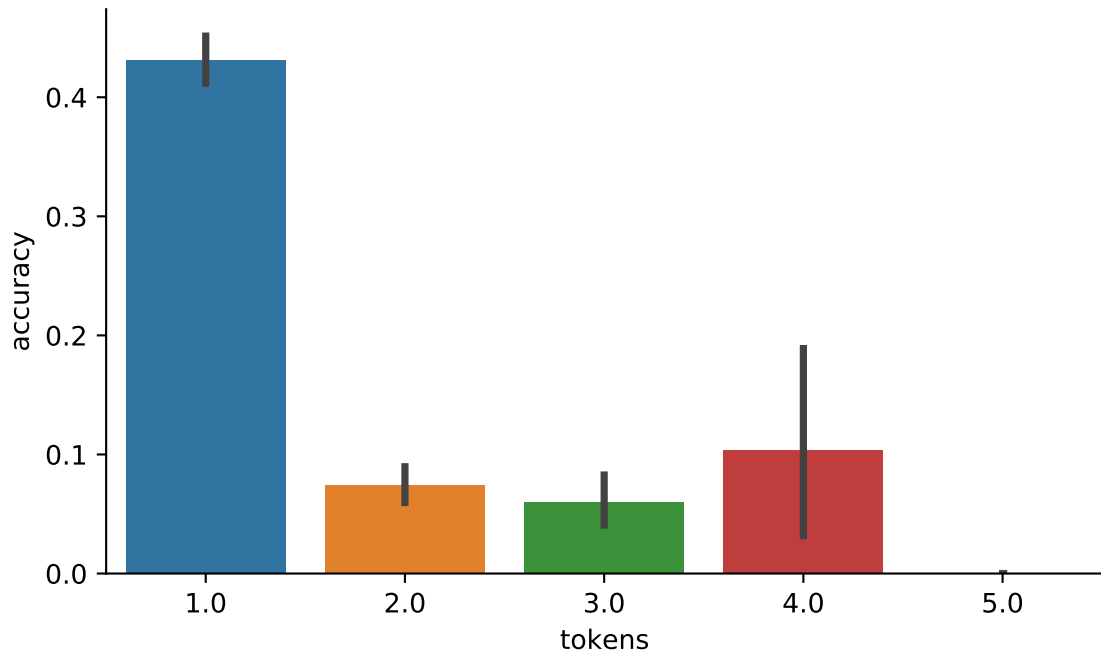

Supplement: Software [file graph_1_mid_frequency_German.pdf › MT-Tokenizer-Bias-main/graphs/graph_1_mid_frequency_German.pdf]

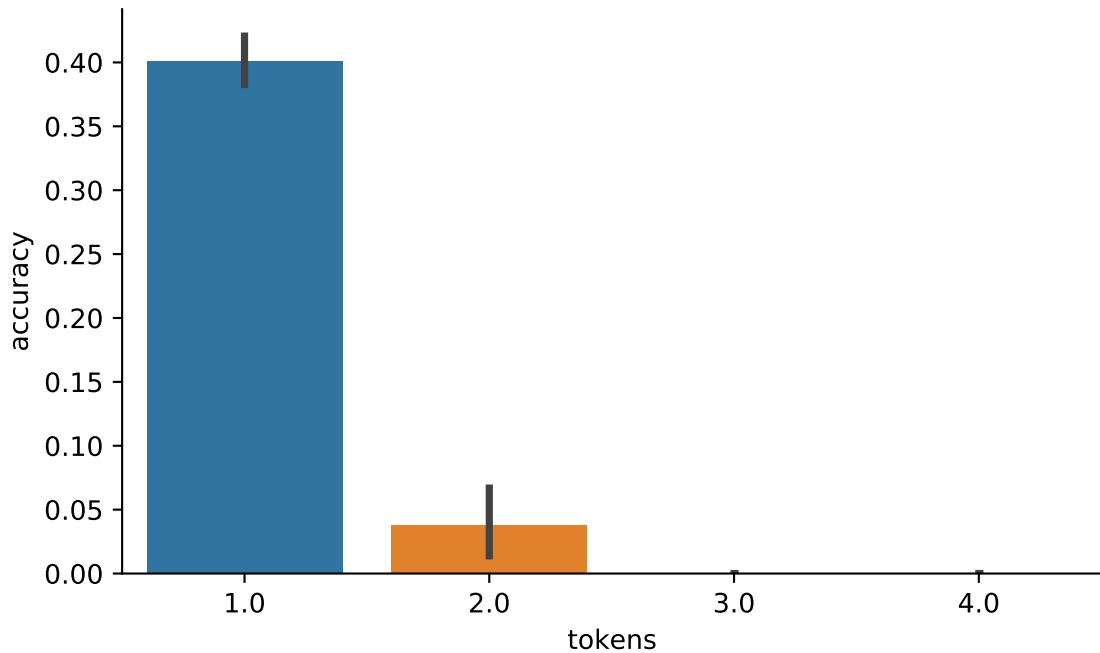

Supplement: Software [file graph_1_mid_frequency_Hebrew.pdf › MT-Tokenizer-Bias-main/graphs/graph_1_mid_frequency_Hebrew.pdf]

German num of tokens per Gender

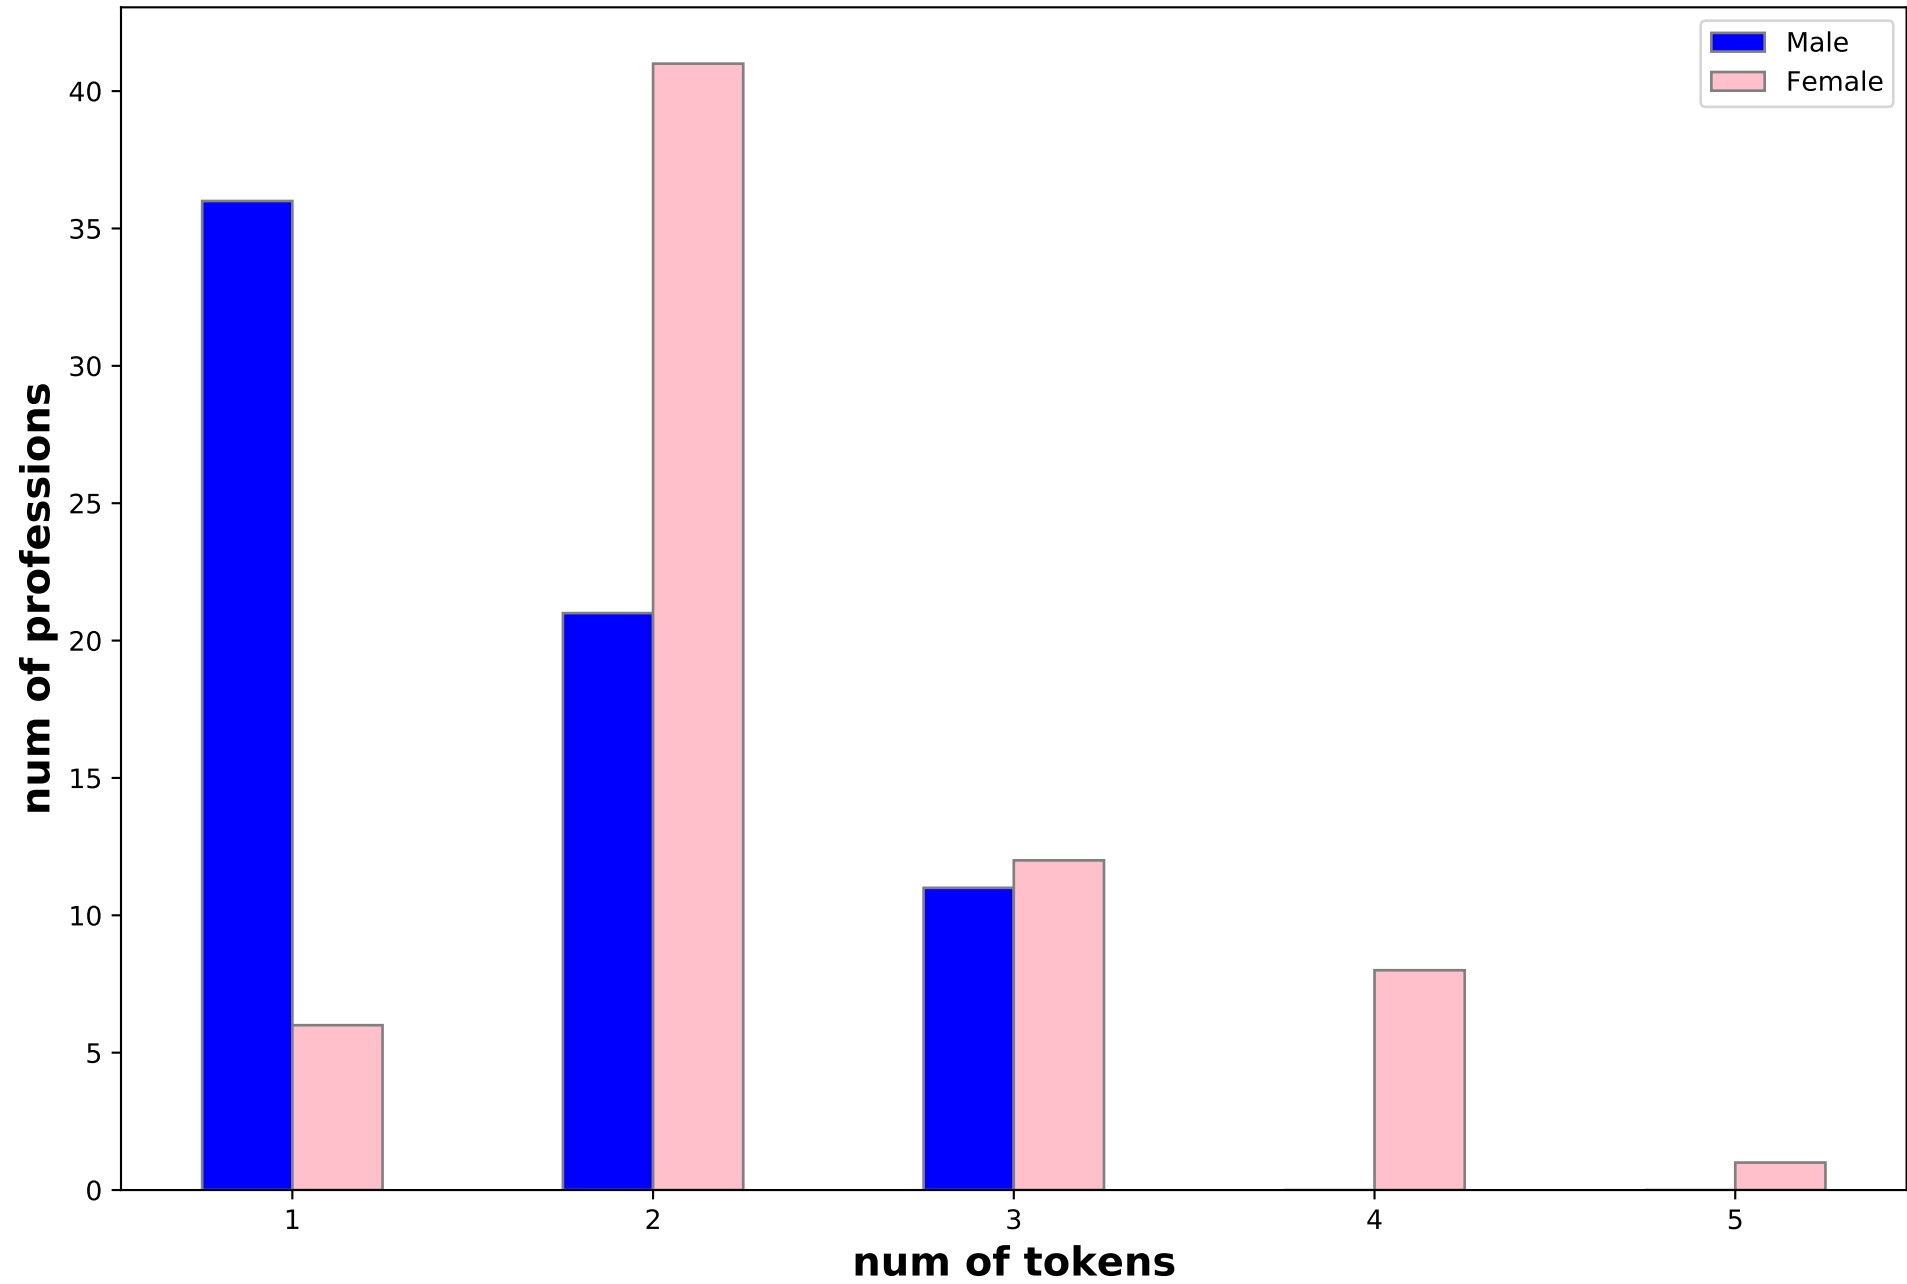

Supplement: Software [file graph_3_de.pdf › MT-Tokenizer-Bias-main/graphs/graph_3_de.pdf]

Hebrew num of tokens per Gender

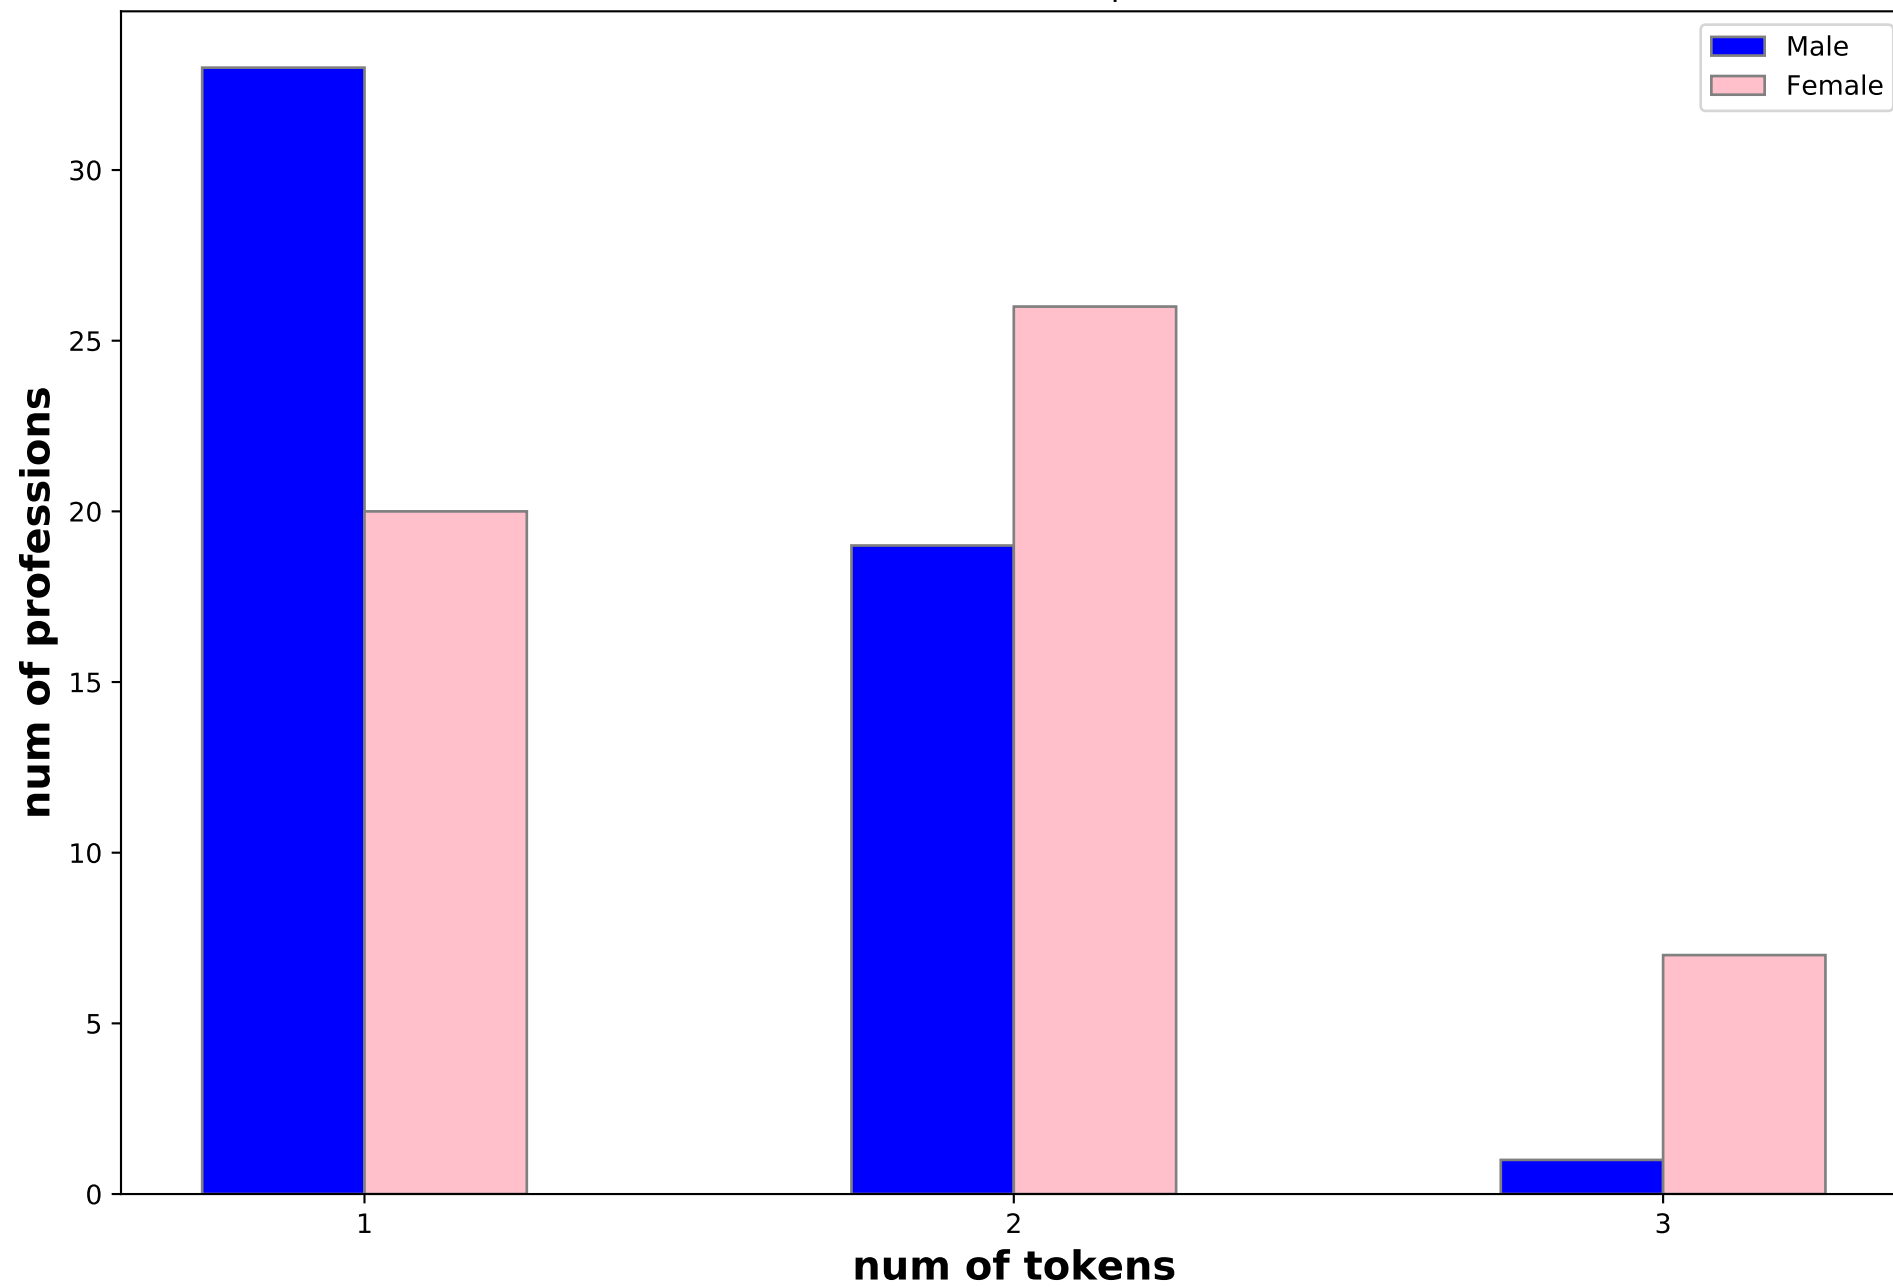

Supplement: Software [file graph_3_he.pdf › MT-Tokenizer-Bias-main/graphs/graph_3_he.pdf]

German num of tokens per stereotype

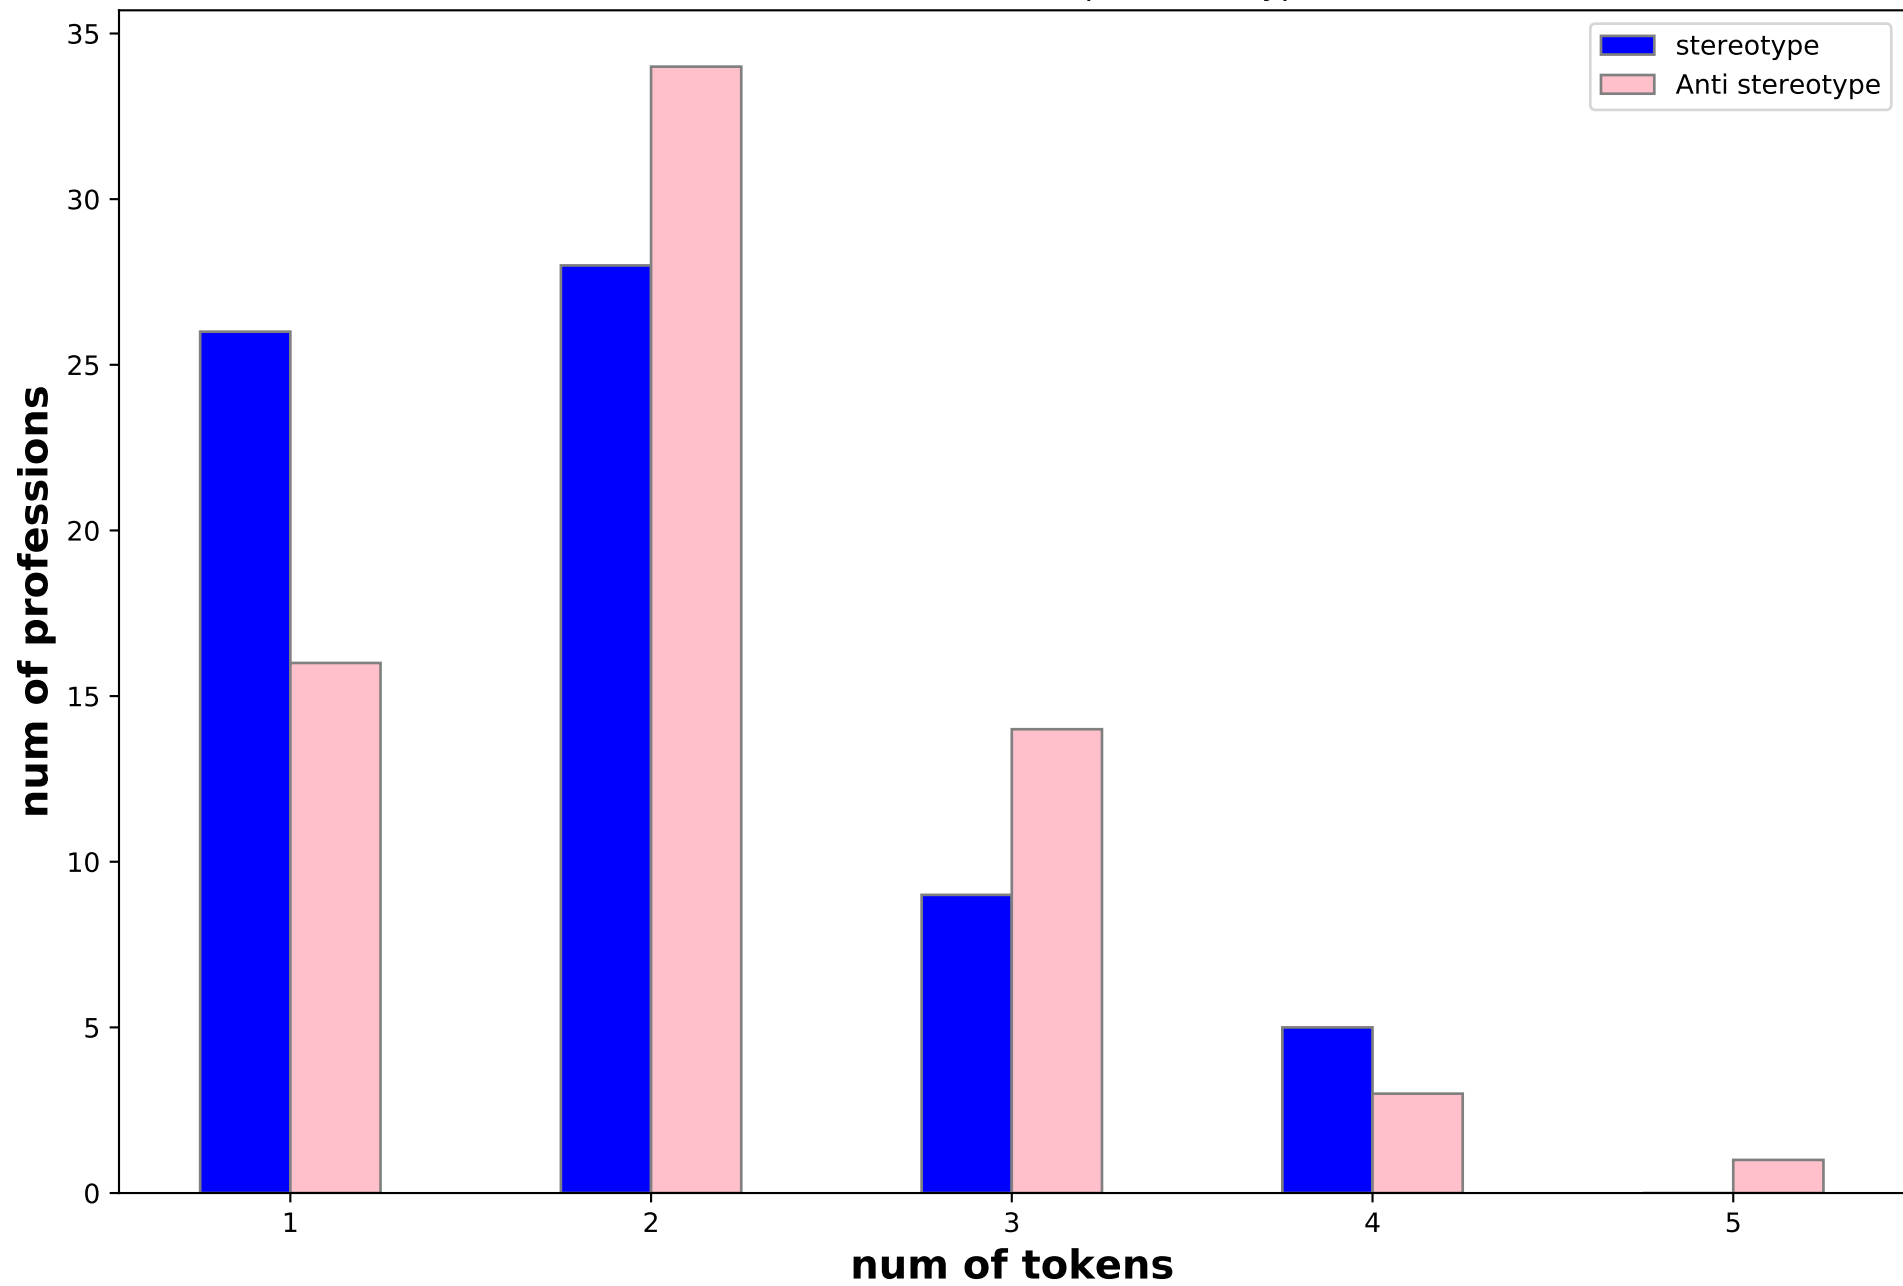

Supplement: Software [file graph_4_de.pdf › MT-Tokenizer-Bias-main/graphs/graph_4_de.pdf]

Hebrew num of tokens per stereotype

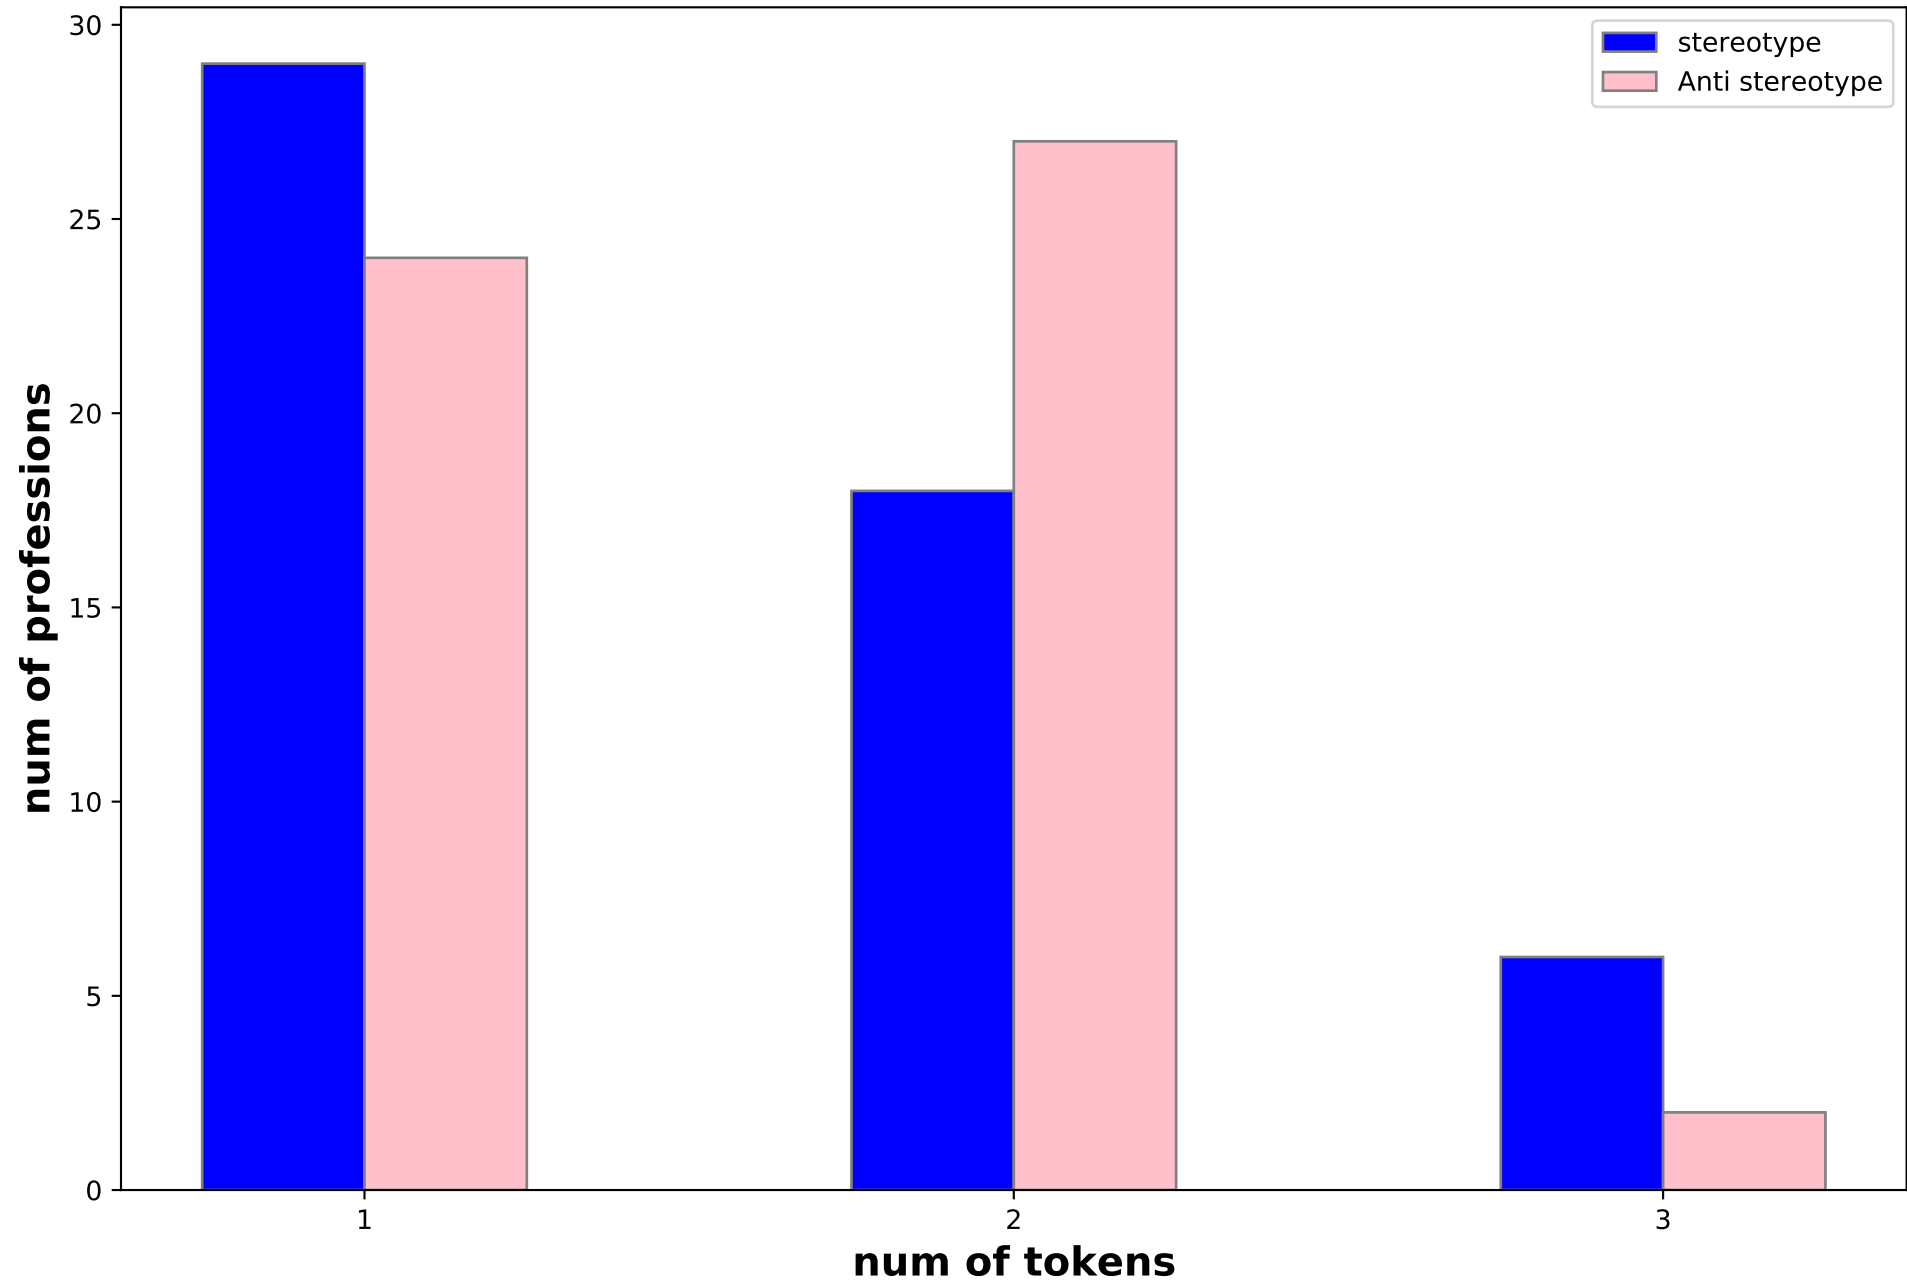

Supplement: Software [file graph_4_he.pdf › MT-Tokenizer-Bias-main/graphs/graph_4_he.pdf]

Delta G per Delta T for each profession German

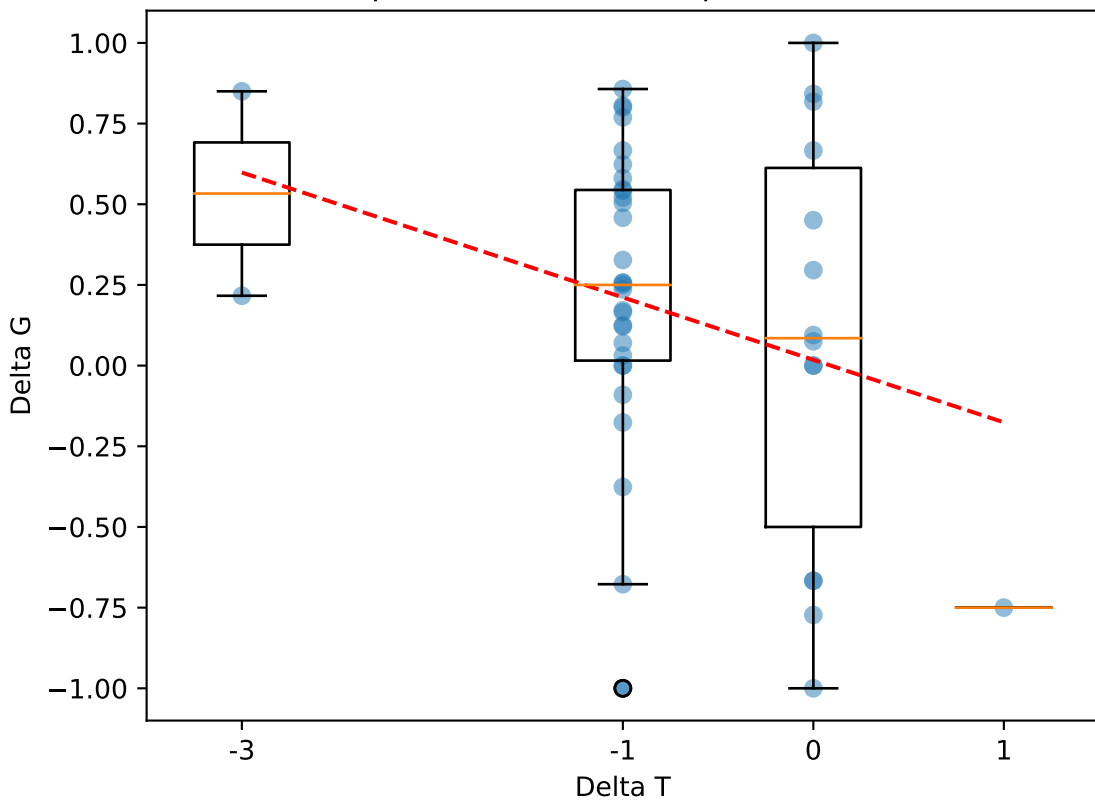

Supplement: Software [file graph_5_German_delta_g.pdf › MT-Tokenizer-Bias-main/graphs/graph_5_German_delta_g.pdf]

Precision per Delta T for each profession German

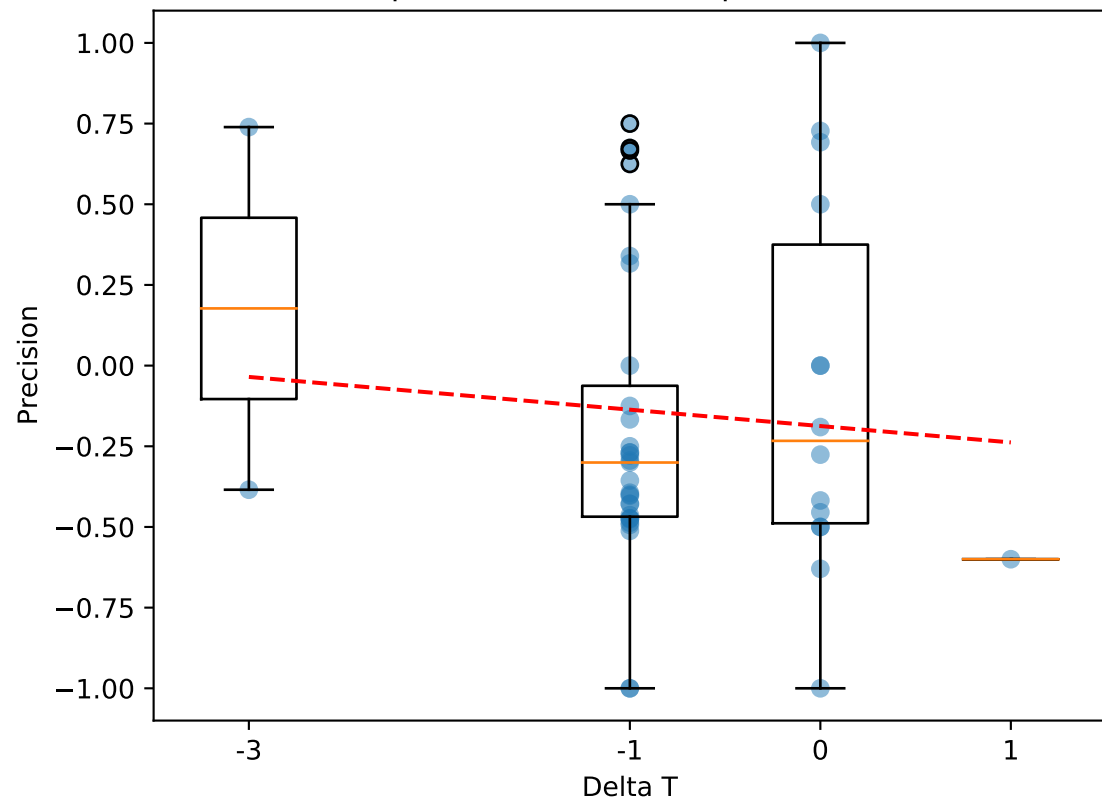

Supplement: Software [file graph_5_German_precision.pdf › MT-Tokenizer-Bias-main/graphs/graph_5_German_precision.pdf]

Recall per Delta T for each profession German

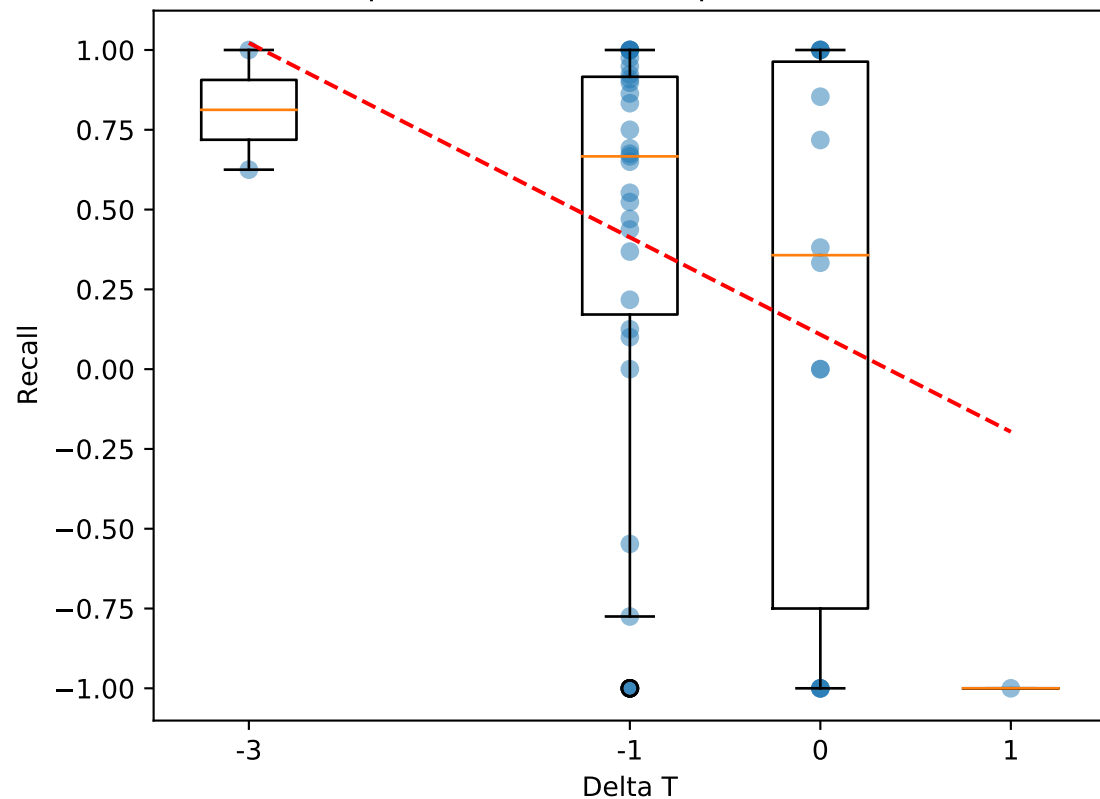

Supplement: Software [file graph_5_German_recall.pdf › MT-Tokenizer-Bias-main/graphs/graph_5_German_recall.pdf]

Delta G per Delta T for each profession Hebrew

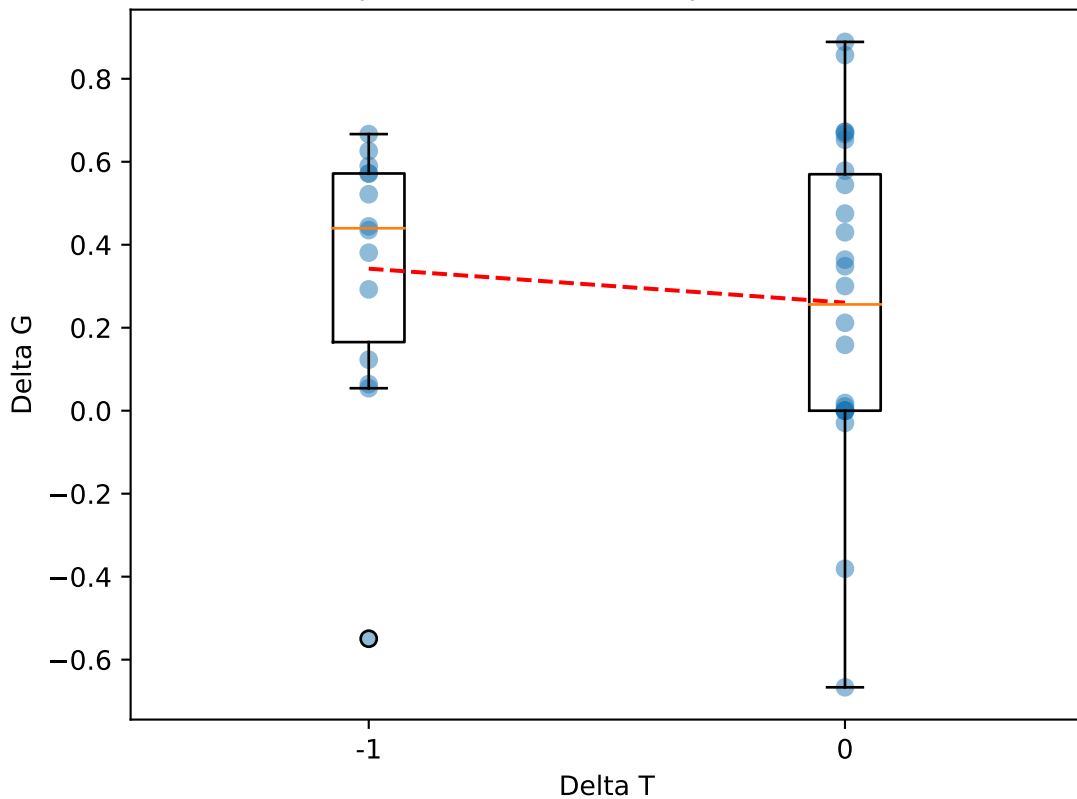

Supplement: Software [file graph_5_Hebrew_delta_g.pdf › MT-Tokenizer-Bias-main/graphs/graph_5_Hebrew_delta_g.pdf]

Precision per Delta T for each profession Hebrew

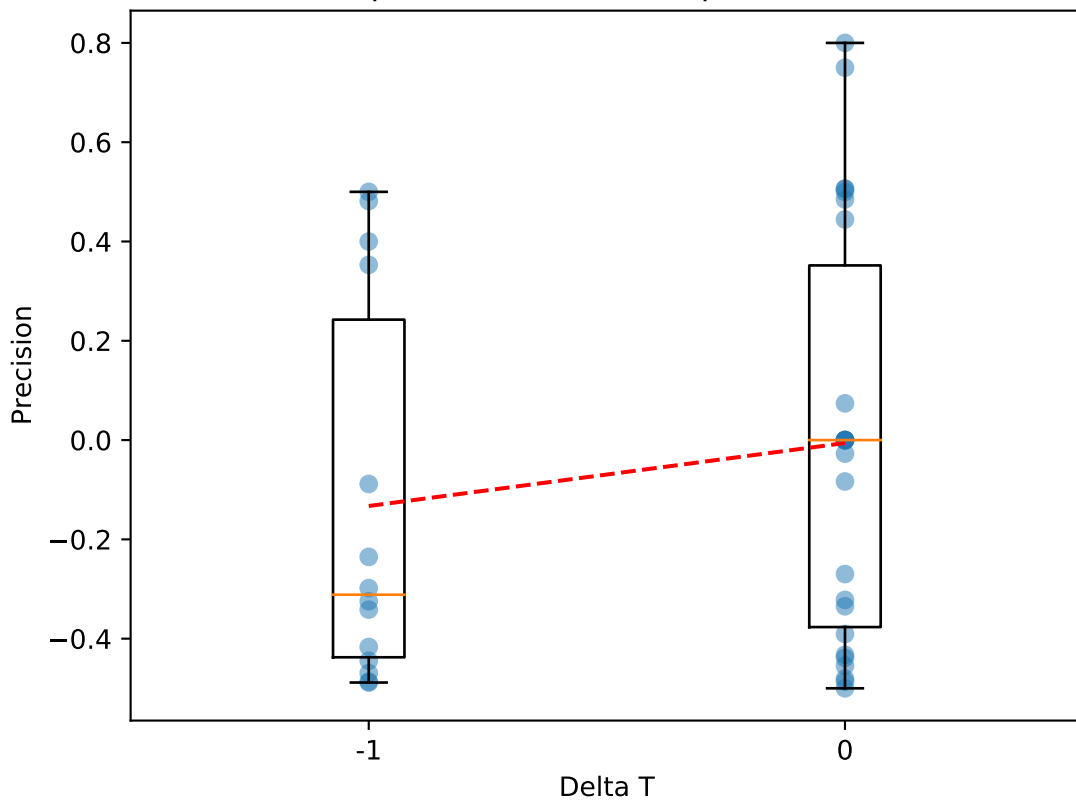

Supplement: Software [file graph_5_Hebrew_precision.pdf › MT-Tokenizer-Bias-main/graphs/graph_5_Hebrew_precision.pdf]

Recall per Delta T for each profession Hebrew

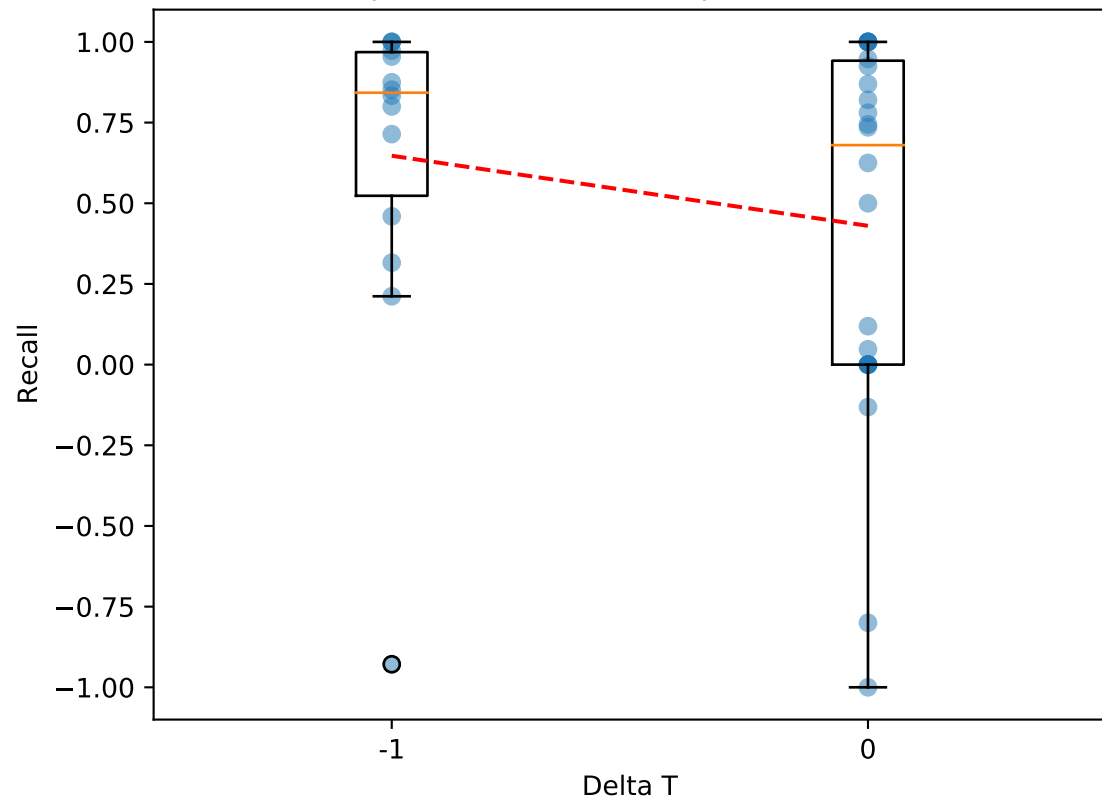

Supplement: Software [file graph_5_Hebrew_recall.pdf › MT-Tokenizer-Bias-main/graphs/graph_5_Hebrew_recall.pdf]

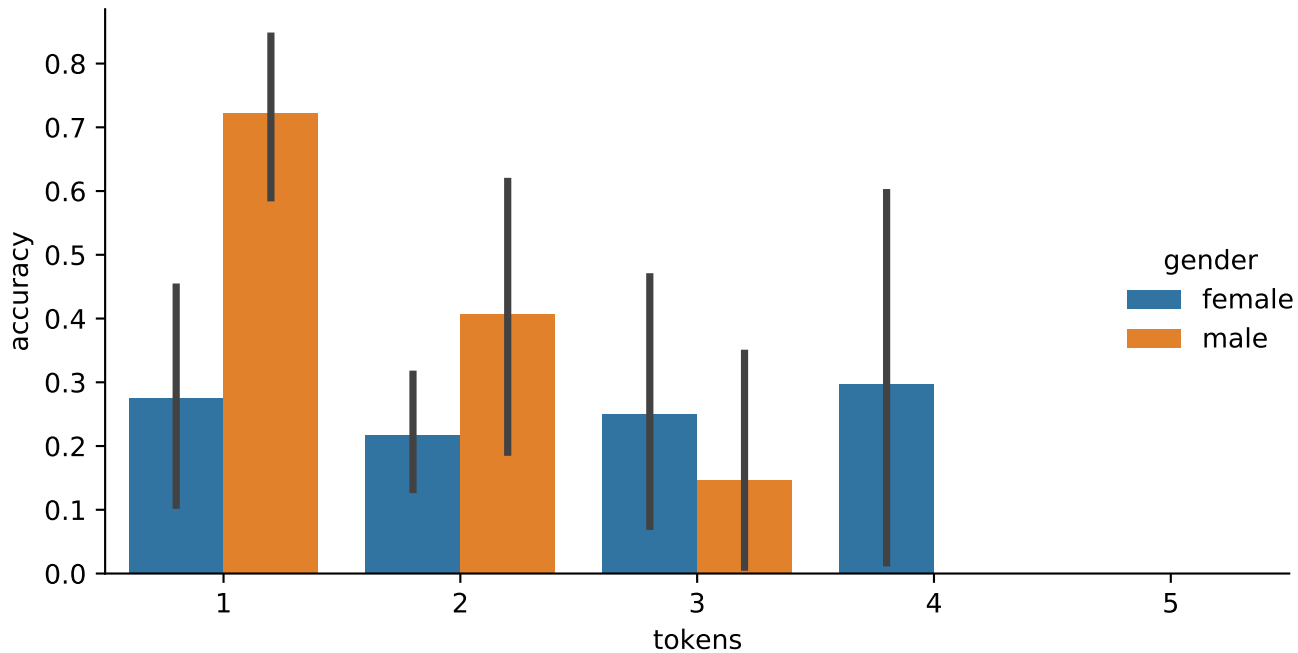

Supplement: Software [file graph_6_per_gender_German.pdf › MT-Tokenizer-Bias-main/graphs/graph_6_per_gender_German.pdf]

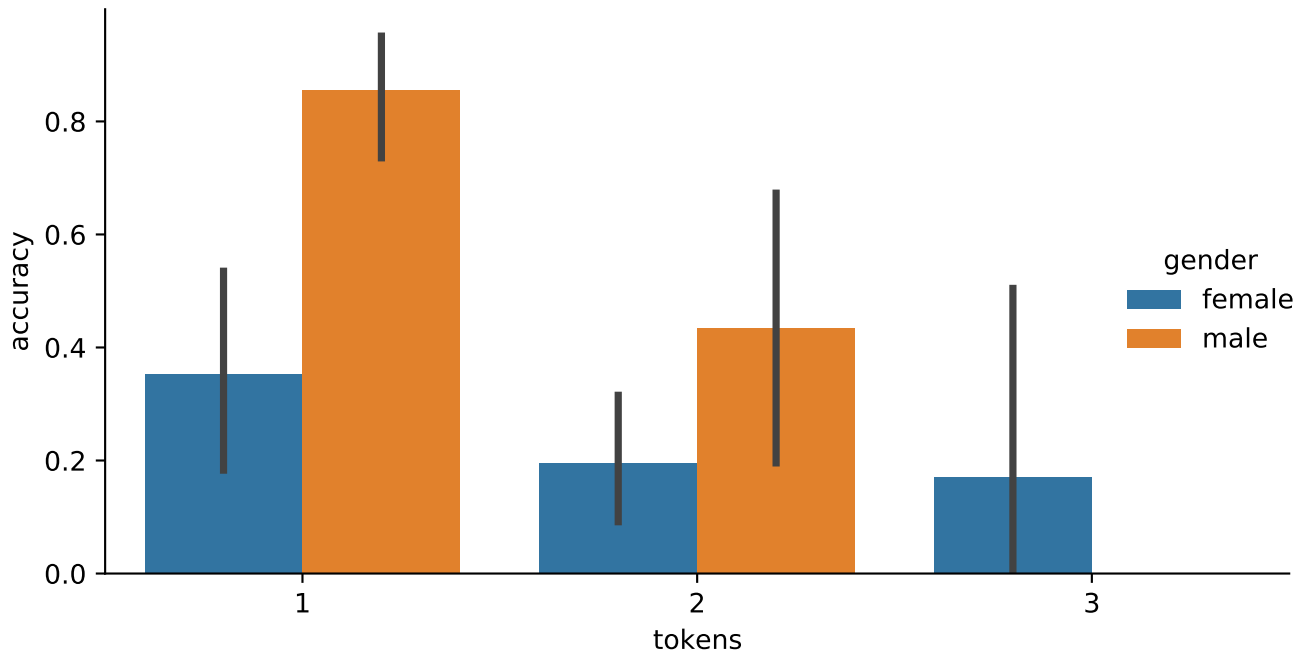

Supplement: Software [file graph_6_per_gender_Hebrew.pdf › MT-Tokenizer-Bias-main/graphs/graph_6_per_gender_Hebrew.pdf]

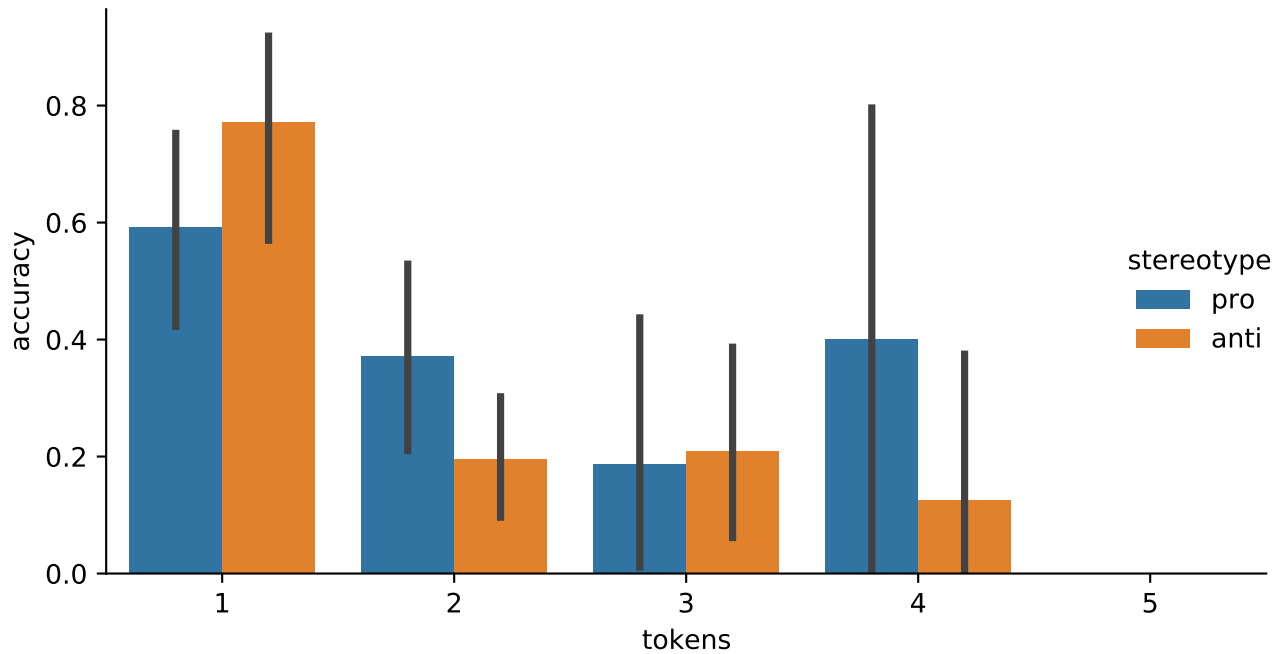

Supplement: Software [file graph_6_per_streotype_German.pdf › MT-Tokenizer-Bias-main/graphs/graph_6_per_streotype_German.pdf]

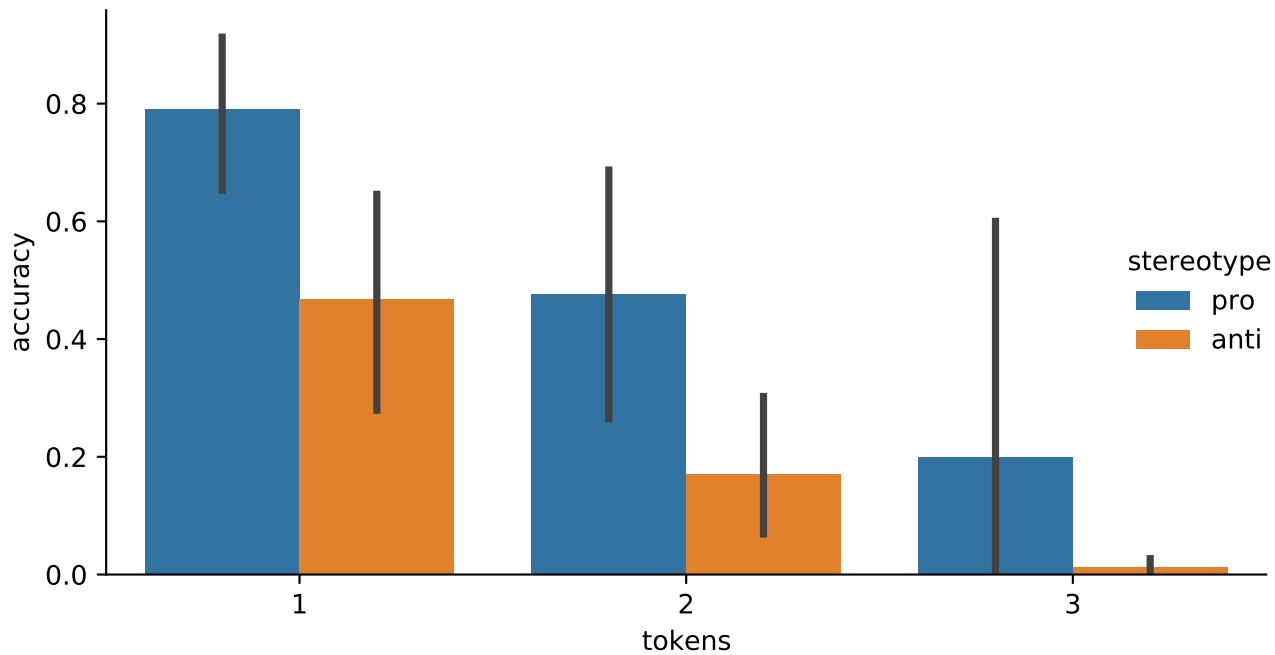

Supplement: Software [file graph_6_per_streotype_Hebrew.pdf › MT-Tokenizer-Bias-main/graphs/graph_6_per_streotype_Hebrew.pdf]
